# Supplementary material for: Work function regulation of surface-engineered Ti2CT2MXenes for efficient electrochemical nitrogen reduction reaction
Source: Royal Society of Chemistry journal article supplement (doi:10.1039/d2nr01861f), 2022-01-01
Supplement: d2nr01861f1.pdf [file d2nr01861f1.pdf]

*Supporting Information for*

**Work Function Regulation of Surface-engineered Ti<sub>2</sub>CT<sub>2</sub> MXene for  
Efficient Electrochemical Nitrogen Reduction Reaction**

Yaqin Zhang<sup>a</sup>, Ninggui Ma<sup>a</sup>, Tairan Wang<sup>a</sup>, Jun Fan<sup>a,b,c</sup>\*

<sup>a</sup> *Department of Materials Science and Engineering, City University of Hong Kong,  
Hong Kong, China*

<sup>b</sup> *Center for Advanced Nuclear Safety and Sustainable Development, City University of  
Hong Kong, Hong Kong, China*

<sup>c</sup> *Department of Mechanical Engineering, City University of Hong Kong, Hong Kong,  
China*

\* *Corresponding author. E-mail: junfan@cityu.edu.hk (Jun Fan)*

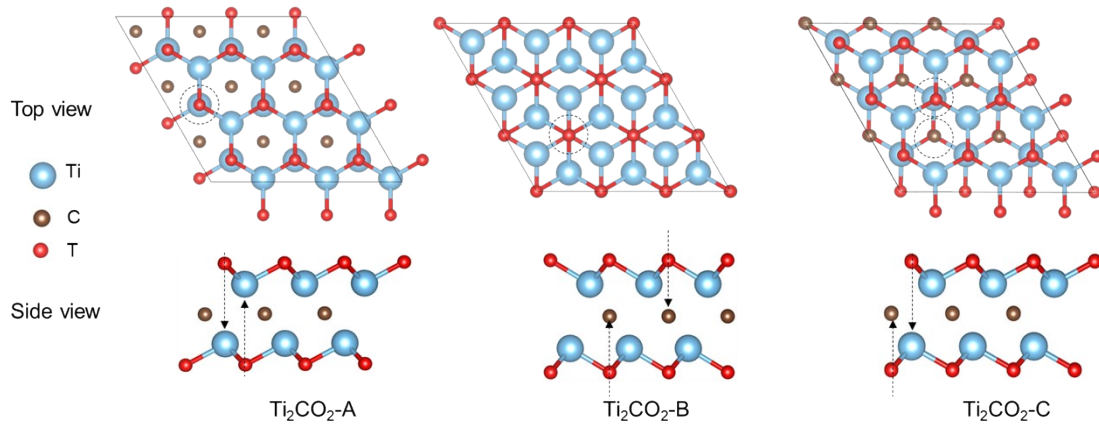

Fig. S1 Configurations of  $\text{Ti}_2\text{CT}_2$  models

Table S1 Total electronic energy of supercell ( $E_0$ ), unit cell ( $E_b$ ), formation energy ( $E_f$ ), and defect formation energy ( $E_{\text{def}}$ ). Formation energy for  $\text{Ti}_2\text{CT}_2$  MXene:  $E_f = (E_0 - E_{\text{Ti}_2\text{C}} - x \times E_{\text{T}})/x$ . Defect formation energy is only considered for the most stable one among the three configurations:  $E_{\text{def}} = E_{\text{Ti}_2\text{CT}_2-\text{V}} - E_{\text{Ti}_2\text{CT}_2} + E_{\text{T}}$ .

| $\text{Ti}_2\text{CT}_2$                             | $E_0$ (eV)     | $E_b$ (eV)     | $E_f$ (eV)   | $E_{\text{def}}$ (eV) |
|------------------------------------------------------|----------------|----------------|--------------|-----------------------|
| <b><math>\text{Ti}_2\text{CF}_2\text{-A}</math></b>  | <b>-354.42</b> | <b>-115.71</b> | <b>-6.81</b> | <b>6.60</b>           |
| $\text{Ti}_2\text{CF}_2\text{-B}$                    | -349.92        | -111.21        | -6.54        | NA                    |
| $\text{Ti}_2\text{CF}_2\text{-C}$                    | -352.57        | -113.86        | -6.70        | NA                    |
| <b><math>\text{Ti}_2\text{CH}_2\text{-A}</math></b>  | <b>-311.14</b> | <b>-63.92</b>  | <b>-3.76</b> | <b>3.69</b>           |
| $\text{Ti}_2\text{CH}_2\text{-B}$                    | -305.26        | -58.04         | -3.41        | NA                    |
| $\text{Ti}_2\text{CH}_2\text{-C}$                    | -307.87        | -60.65         | -3.57        | NA                    |
| <b><math>\text{Ti}_2\text{CO}_2\text{-A}</math></b>  | <b>-402.17</b> | <b>-141.61</b> | <b>-8.33</b> | <b>7.59</b>           |
| $\text{Ti}_2\text{CO}_2\text{-B}$                    | -388.23        | -127.66        | -7.51        | NA                    |
| $\text{Ti}_2\text{CO}_2\text{-C}$                    | -395.76        | -135.19        | -7.95        | NA                    |
| <b><math>\text{Ti}_2\text{COH}_2\text{-A}</math></b> | <b>-457.10</b> | <b>-101.90</b> | <b>-5.99</b> | <b>5.39</b>           |
| $\text{Ti}_2\text{COH}_2\text{-B}$                   | -454.37        | -99.17         | -5.83        | NA                    |
| $\text{Ti}_2\text{COH}_2\text{-C}$                   | -456.04        | -100.84        | -5.93        | NA                    |

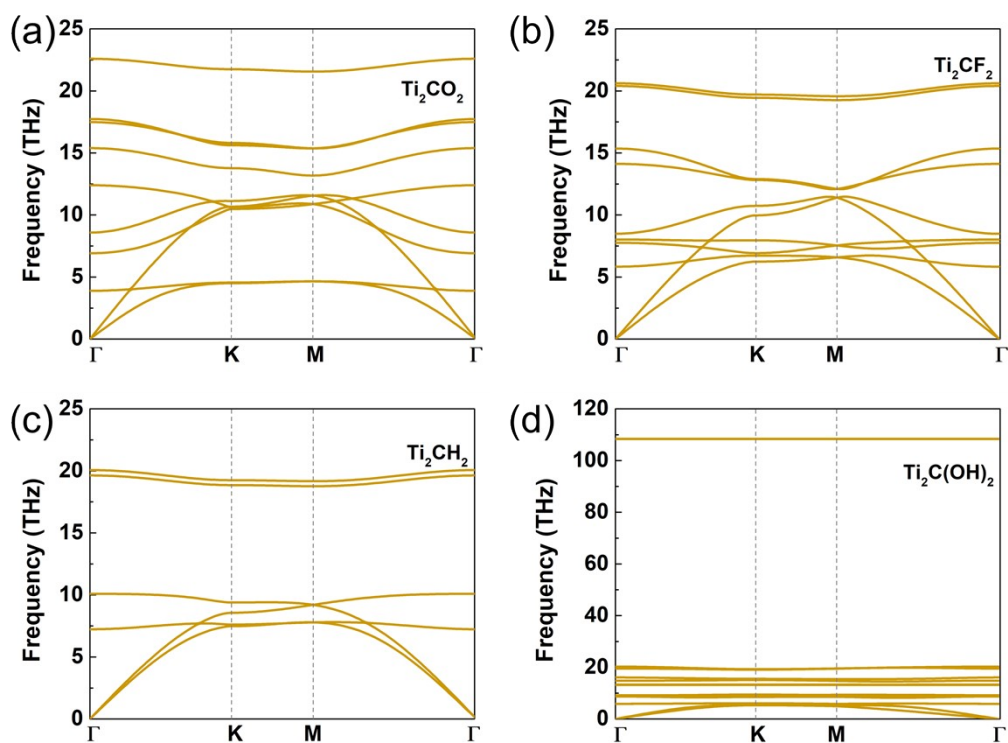

Fig. S2 Calculated phonon band structures of the  $\text{Ti}_2\text{CT}_2$  unitcell.

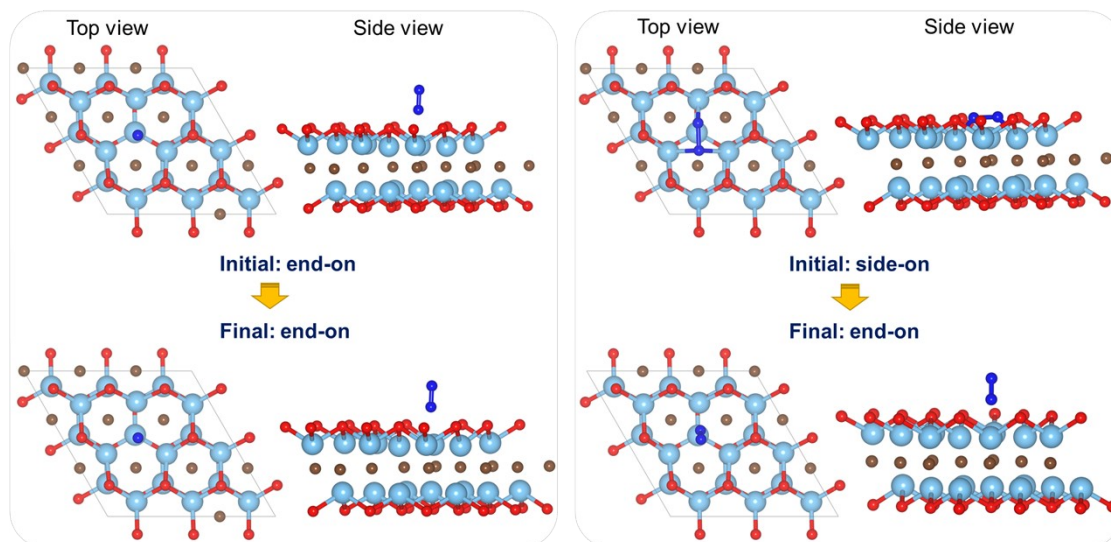

Fig. S3 The initial configurations of end-on and side-on adsorption and their optimized final states.

Table S2 Gibbs free energy through distal and consecutive mechanism

| <b><math>\Delta G</math> (distal)</b>      | <b>Ti<sub>2</sub>CO<sub>2</sub></b> | <b>Ti<sub>2</sub>CF<sub>2</sub></b> | <b>Ti<sub>2</sub>CH<sub>2</sub></b> | <b>Ti<sub>2</sub>C(OH)<sub>2</sub></b> |
|--------------------------------------------|-------------------------------------|-------------------------------------|-------------------------------------|----------------------------------------|
| Slab                                       | 0.00                                | 0.00                                | 0.00                                | 0.00                                   |
| *N <sub>2</sub>                            | -0.03                               | -0.33                               | -0.39                               | -0.76                                  |
| *NNH                                       | 0.50                                | -0.52                               | -0.65                               | -1.11                                  |
| *NNH <sub>2</sub>                          | -0.72                               | -1.21                               | -1.59                               | -1.14                                  |
| *N                                         | -0.97                               | -2.10                               | -2.10                               | -2.36                                  |
| *NH                                        | -2.06                               | -2.86                               | -2.90                               | -2.75                                  |
| *NH <sub>2</sub>                           | -2.02                               | -2.48                               | -2.56                               | -2.08                                  |
| *NH <sub>3</sub>                           | -1.90                               | -1.58                               | -1.36                               | -0.79                                  |
| slab                                       | -0.89                               | -0.89                               | -0.89                               | -0.89                                  |
| <b><math>\Delta G</math> (consecutive)</b> | <b>Ti<sub>2</sub>CO<sub>2</sub></b> | <b>Ti<sub>2</sub>CF<sub>2</sub></b> | <b>Ti<sub>2</sub>CH<sub>2</sub></b> | <b>Ti<sub>2</sub>C(OH)<sub>2</sub></b> |
| Slab                                       | 0.00                                | 0.00                                | 0.00                                | 0.00                                   |
| *N <sub>2</sub>                            | -0.03                               | -0.33                               | -0.39                               | -0.76                                  |
| *NNH                                       | 0.50                                | -0.52                               | -0.65                               | -1.11                                  |
| *NH-NH                                     | 0.00                                | -0.84                               | -1.11                               | -0.20                                  |
| *NH-NH <sub>2</sub>                        | -0.53                               | -0.99                               | -1.27                               | -0.09                                  |
| *NH <sub>2</sub> -NH <sub>2</sub>          | -0.12                               | 0.15                                | 0.27                                | 1.33                                   |
| *NH <sub>2</sub>                           | -2.02                               | -2.48                               | -2.56                               | -2.08                                  |
| *NH <sub>3</sub>                           | -1.90                               | -1.58                               | -1.36                               | -0.79                                  |
| slab                                       | -0.89                               | -0.89                               | -0.89                               | -0.89                                  |

Table S3 Free energy barrier through distal and consecutive mechanism including electronic steps.

| <b><math>\Delta G</math> (distal)</b>      | <b>Ti<sub>2</sub>CO<sub>2</sub></b> | <b>Ti<sub>2</sub>CF<sub>2</sub></b> | <b>Ti<sub>2</sub>CH<sub>2</sub></b> | <b>Ti<sub>2</sub>C(OH)<sub>2</sub></b> |
|--------------------------------------------|-------------------------------------|-------------------------------------|-------------------------------------|----------------------------------------|
| *N <sub>2</sub>                            | NA                                  | NA                                  | NA                                  | NA                                     |
| *NNH                                       | 0.53                                | -0.19                               | -0.27                               | -0.35                                  |
| *NNH <sub>2</sub>                          | -1.22                               | -0.69                               | -0.94                               | -0.03                                  |
| *N                                         | -0.24                               | -0.90                               | -0.51                               | -1.21                                  |
| *NH                                        | -1.10                               | -0.75                               | -0.80                               | -0.40                                  |
| *NH <sub>2</sub>                           | 0.04                                | 0.38                                | 0.34                                | 0.67                                   |
| *NH <sub>3</sub>                           | 0.12                                | 0.90                                | 1.21                                | 1.29                                   |
| <b><math>\Delta G</math> (consecutive)</b> | <b>Ti<sub>2</sub>CO<sub>2</sub></b> | <b>Ti<sub>2</sub>CF<sub>2</sub></b> | <b>Ti<sub>2</sub>CH<sub>2</sub></b> | <b>Ti<sub>2</sub>C(OH)<sub>2</sub></b> |
| *N <sub>2</sub>                            | NA                                  | NA                                  | NA                                  | NA                                     |
| *NNH                                       | 0.53                                | -0.19                               | -0.27                               | -0.35                                  |
| *NH-NH                                     | -0.50                               | -0.32                               | -0.45                               | 0.92                                   |
| *NH-NH <sub>2</sub>                        | -0.53                               | -0.15                               | -0.17                               | 0.10                                   |
| *NH <sub>2</sub> -NH <sub>2</sub>          | 0.41                                | 1.15                                | 1.54                                | 1.42                                   |
| *NH <sub>2</sub>                           | -1.90                               | -2.63                               | -2.83                               | -3.41                                  |
| *NH <sub>3</sub>                           | 0.12                                | 0.90                                | 1.21                                | 1.29                                   |

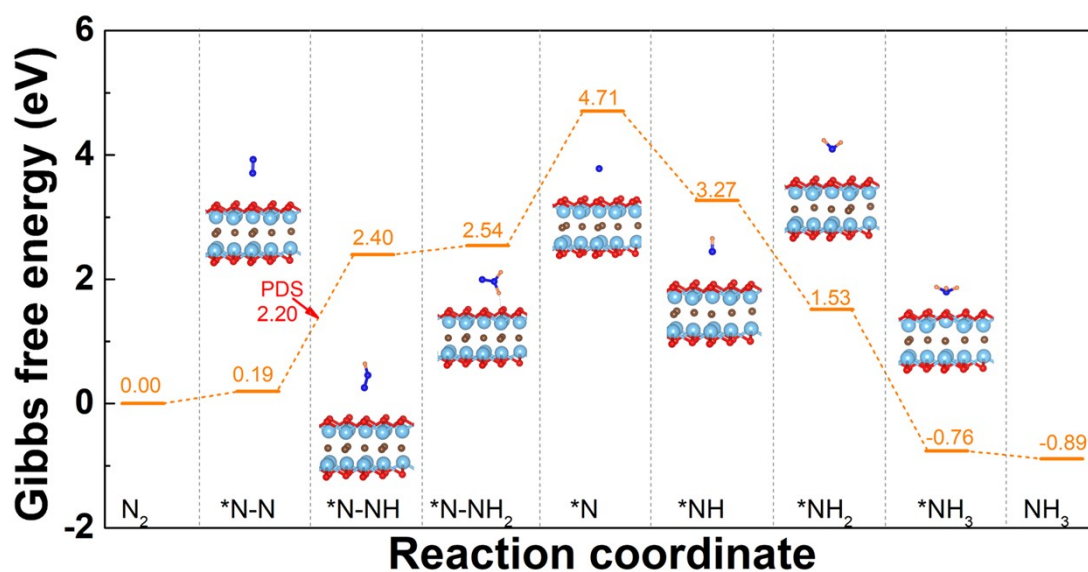

Fig. S4 Free energy profiles for nitrogen reduction on perfect  $\text{Ti}_2\text{CO}_2$  through distal mechanisms, and the configuration for each reaction intermediate is shown as well.

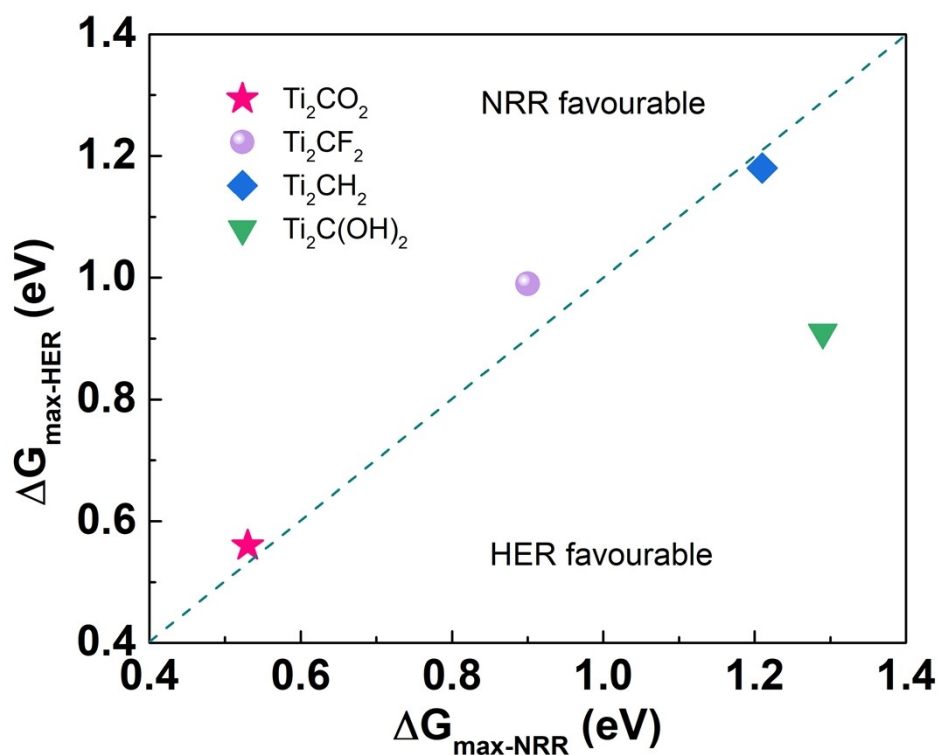

Fig. S5 Free energy potential of rate-determining steps for NRR and HER. The values of  $\Delta G_{\text{max}}$  for HER are 0.56 eV ( $\text{Ti}_2\text{CO}_2$ ), 0.99 eV ( $\text{Ti}_2\text{CF}_2$ ), 1.18 eV ( $\text{Ti}_2\text{CH}_2$ ), and 0.91 eV ( $\text{Ti}_2\text{C}(\text{OH})_2$ ). The dashed line represents  $\Delta G_{\text{max-HER}} = \Delta G_{\text{max-NRR}}$ .

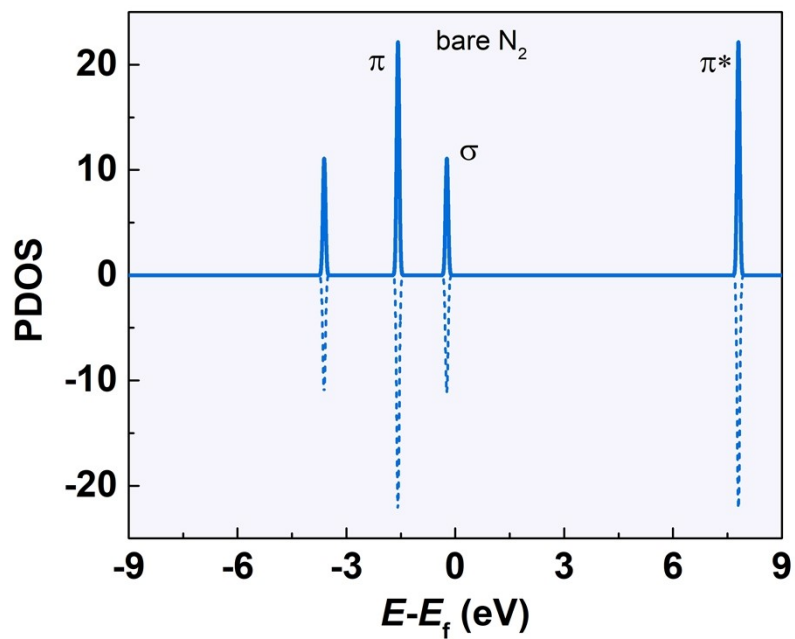

Fig. S6 Projected density of states of pure  $N_2$  molecule.

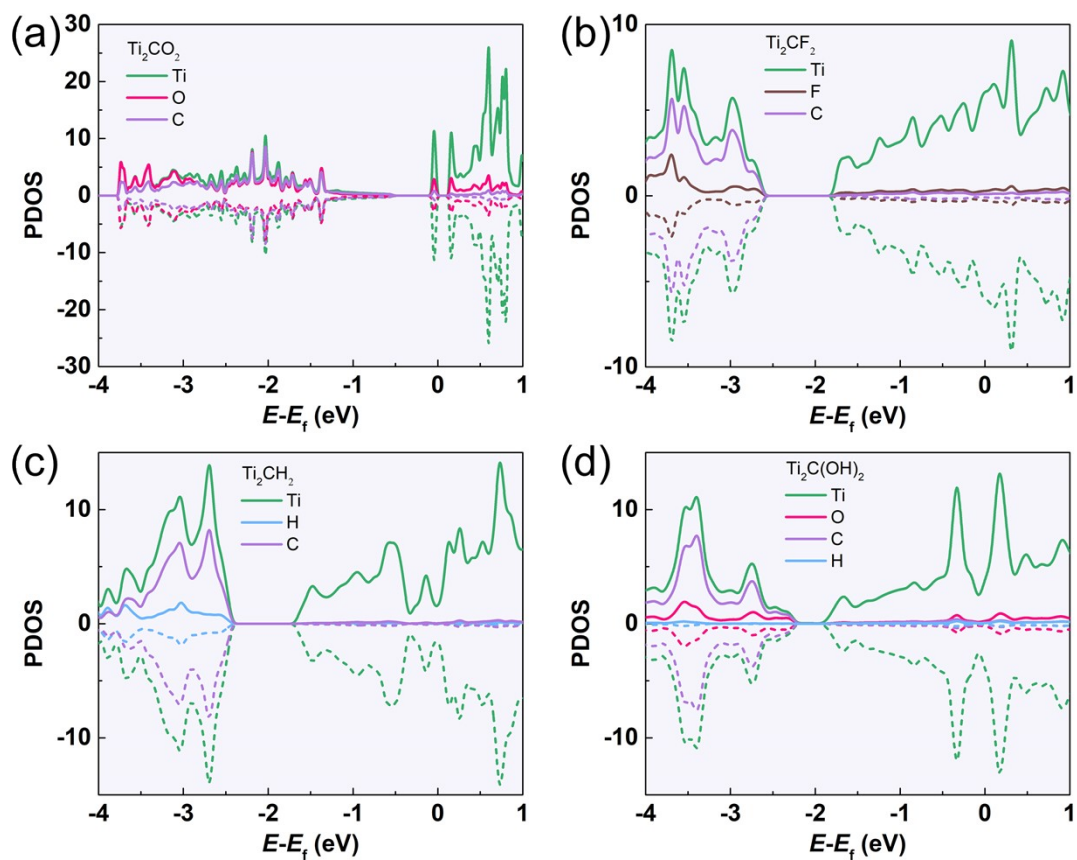

Fig. S7 Projected density of states of defective (a)  $Ti_2CO_2$ , (b)  $Ti_2CF_2$ , (c)  $Ti_2CH_2$ , and (d)  $Ti_2C(OH)_2$ .

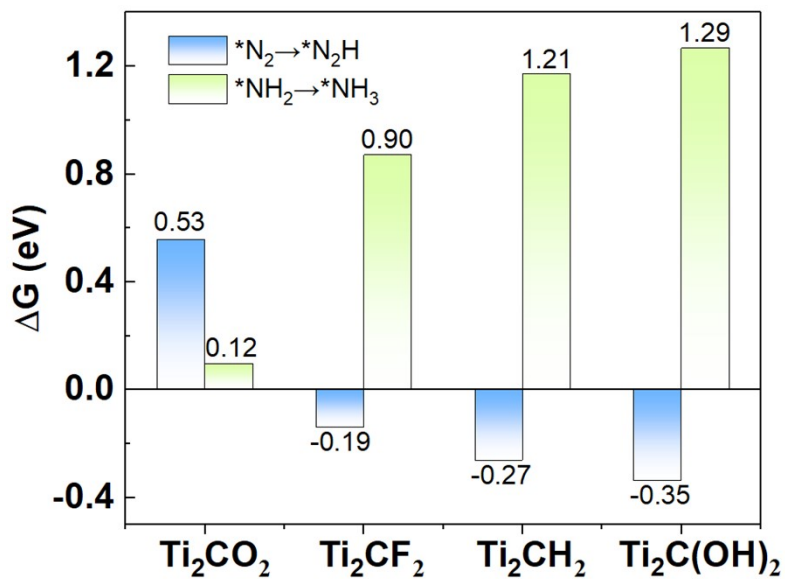

Fig. S8 Free energy barrier of potential-determining steps following distal path.

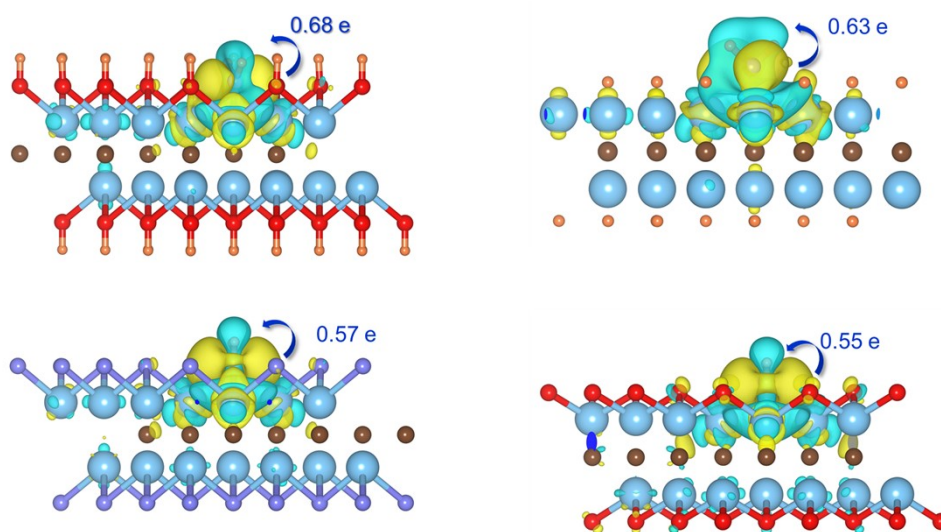

Fig. S9 Charge transfer and electron density difference between defective (a) Ti<sub>2</sub>C(OH)<sub>2</sub>, (b) Ti<sub>2</sub>CH<sub>2</sub>, (c) Ti<sub>2</sub>CF<sub>2</sub>, and (d) Ti<sub>2</sub>CO<sub>2</sub> and intermediate \*NH<sub>2</sub>.



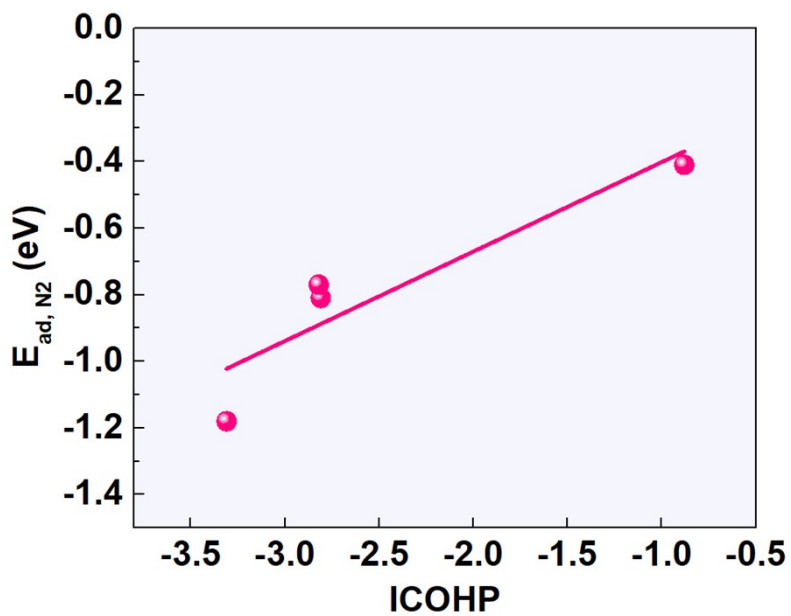

Fig. S10 Linear fitting between ICOHP and adsorption energy of N<sub>2</sub>.

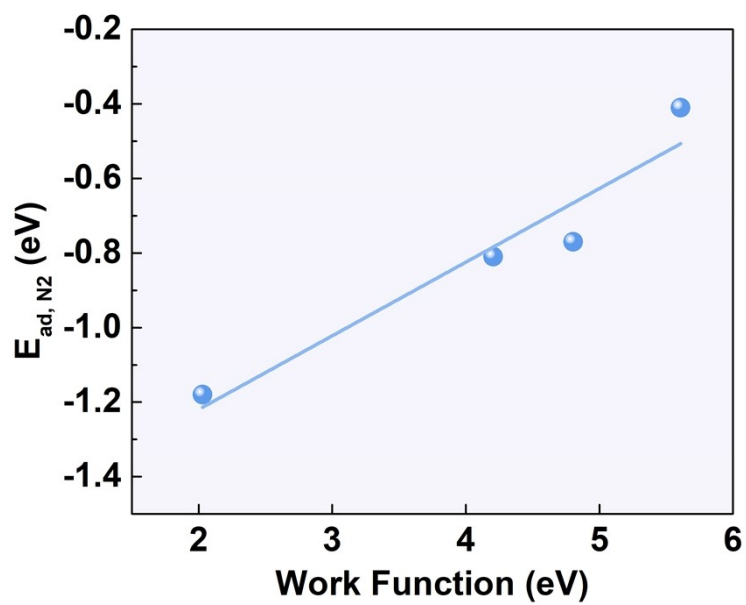

Fig. S11 Linear fitting between work function and adsorption energy of N<sub>2</sub>.
